# Supplementary material for: Carbon nanosphere–iron oxide nanocomposites as high-capacity adsorbents for arsenic removal
Source: Royal Society of Chemistry journal article supplement (doi:10.1039/c7ra06187k), 2017-01-01
Supplement: c7ra06187k1.pdf [file c7ra06187k1.pdf]

Electronic Supplementary Information (ESI) for

**Carbon Nanosphere–Iron Oxide Nanocomposites as High-Capacity  
Adsorbents for Arsenic Removal**

Hui Su,<sup>1</sup> Zhibin Ye,<sup>1,2\*</sup> Nuri Hmidi,<sup>3</sup> and Ramesh Subramanian<sup>1</sup>

<sup>1.</sup> Bharti School of Engineering, Laurentian University, Sudbury, Ontario P3E 2C6, Canada

<sup>2.</sup> Department of Chemical and Materials Engineering, Concordia University, Montreal, Quebec  
H3G 1M8, Canada

<sup>3.</sup> Goldcorp Incorporated, Red Lake Gold Mines, 15 Mine Road, Box 2000, Balmertown,  
Ontario P0V 1C0, Canada

\* Corresponding author. Email: [zye@laurentian.ca](mailto:zye@laurentian.ca) or [zhibin.ye@concordia.ca](mailto:zhibin.ye@concordia.ca).

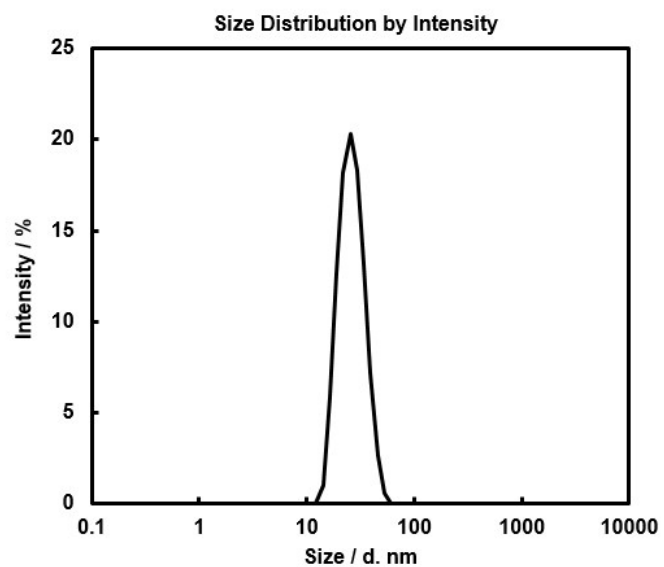

**Figure S1.** Size distribution (average size: 27 nm; PDI: 0.19) of poly(DEB) polymer nanospheres obtained by catalytic emulsion polymerization by DLS measurement.

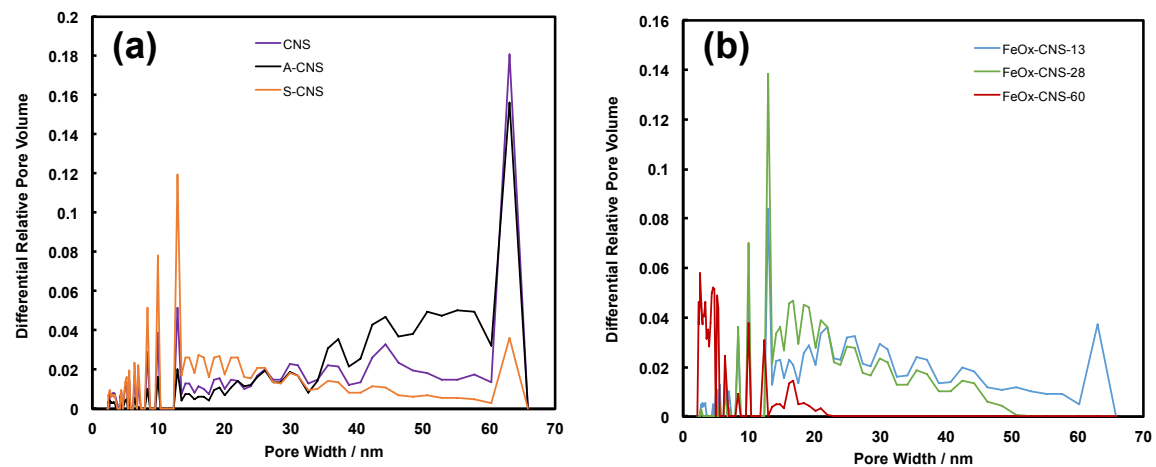

**Figure S2.** Mesopore/macropore size distributions (obtained by DFT model) of (a) CNS, A-CNS, and S-CNS; (b) three FeO<sub>x</sub>-CNS composites.

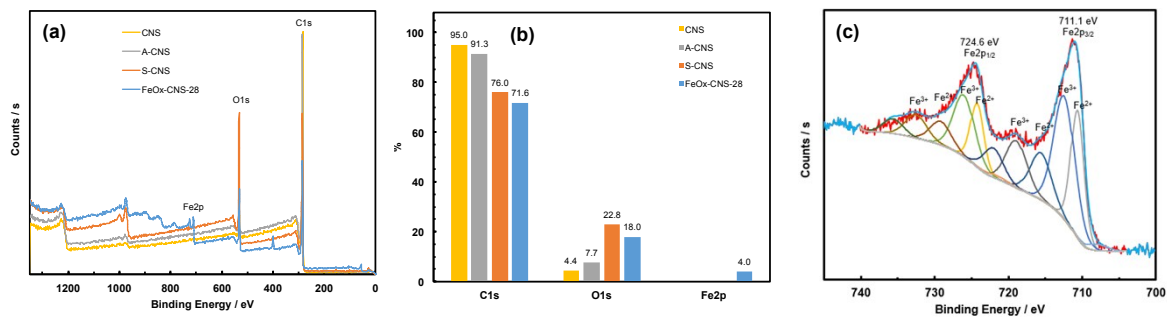

**Figure S3.** (a) XPS survey scan of CNS, A-CNS, S-CNS, and FeO<sub>x</sub>-CNS-28; (b) The content of C, O, and Fe in CNS, A-CNS, S-CNS, and FeO<sub>x</sub>-CNS-28 determined by XPS; (c) high-resolution Fe<sub>2p</sub> spectra of FeO<sub>x</sub>-CNS-28.

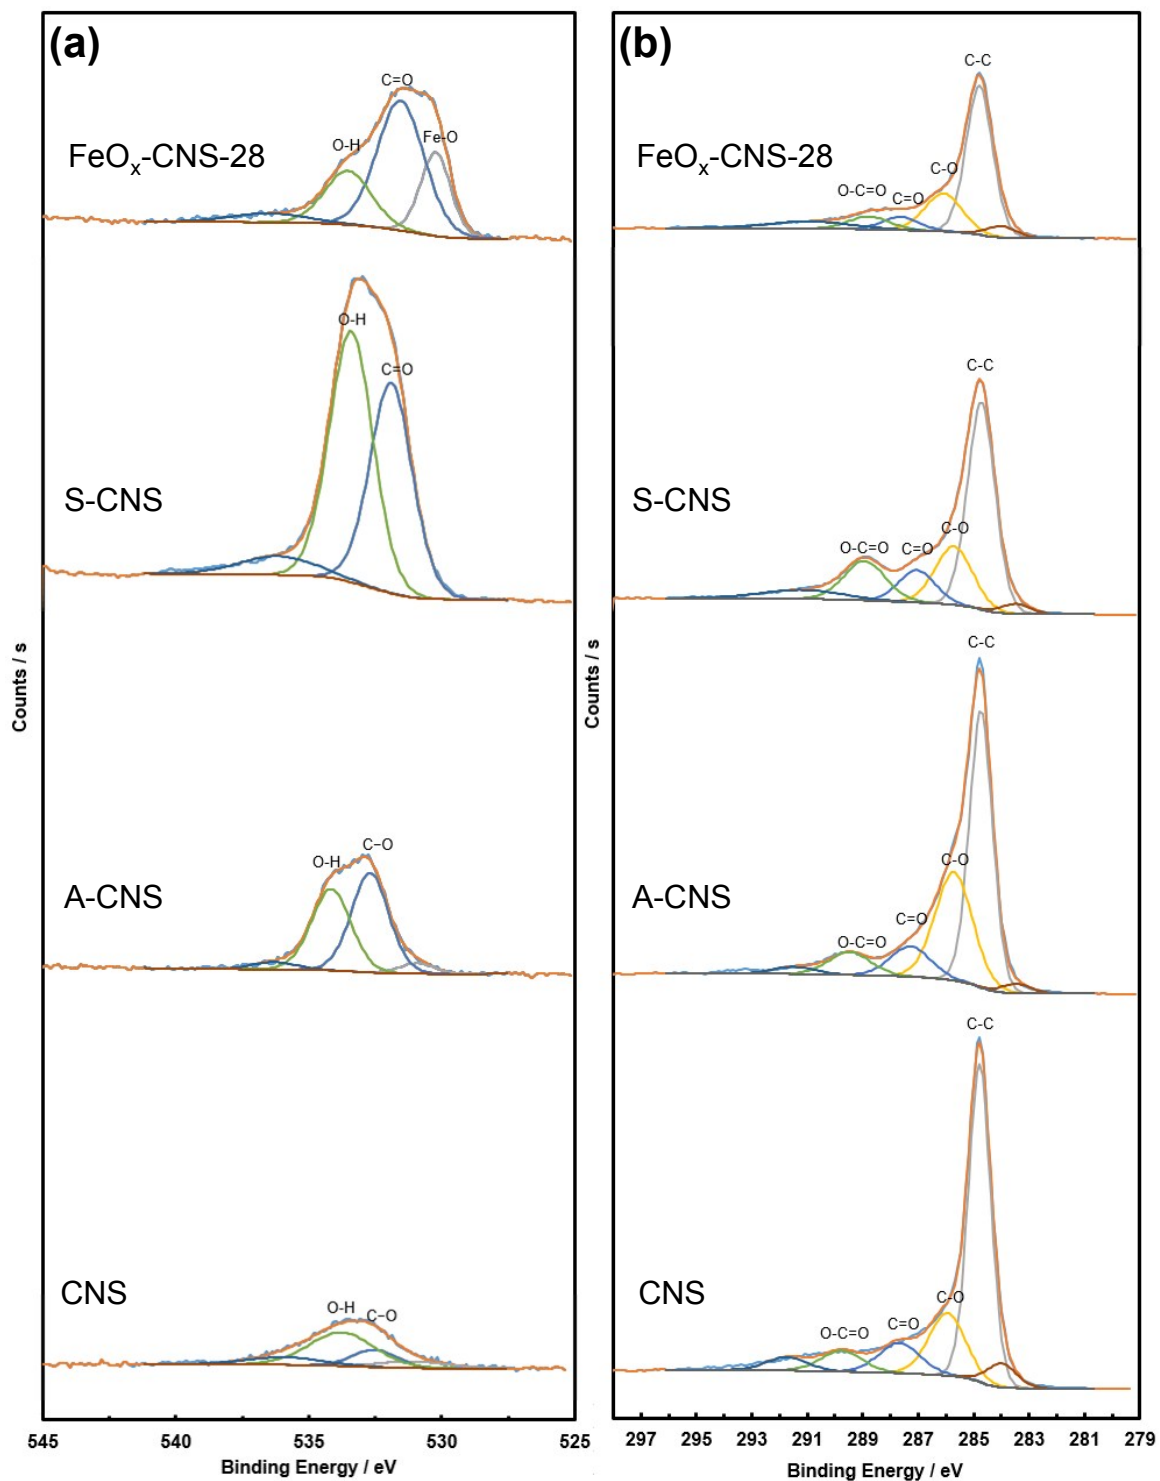

**Figure S4.** The O<sub>1s</sub> (a) and C<sub>1s</sub> (b) spectra of CNS, A-CNS, S-CNS and FeO<sub>x</sub>-CNS-28.

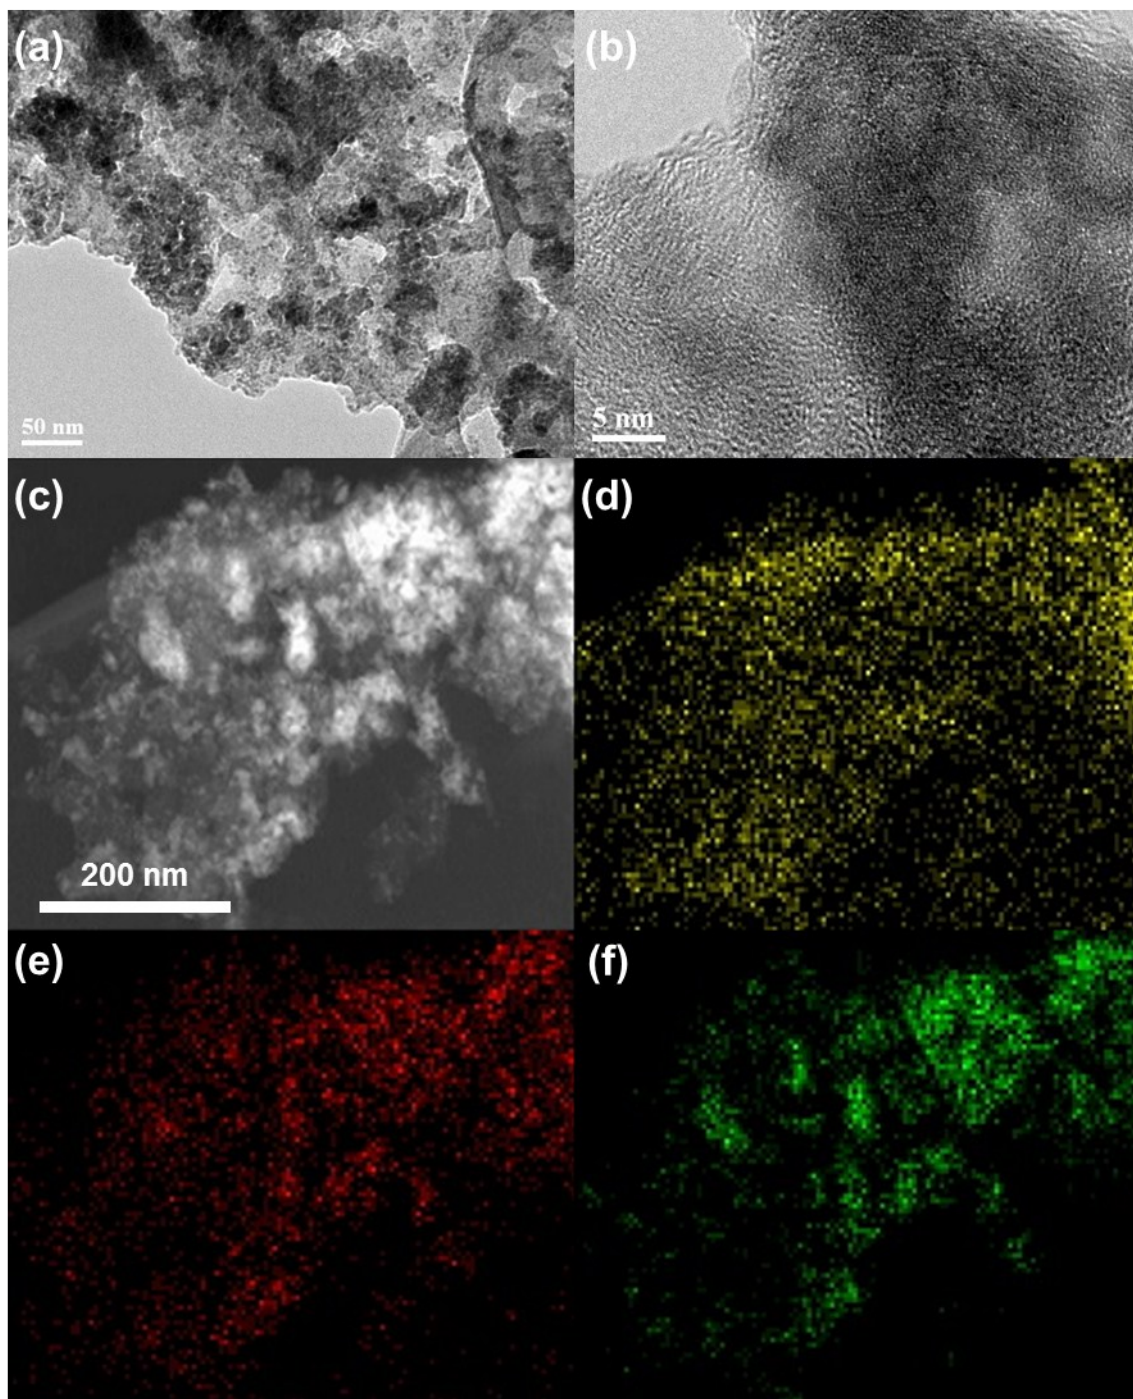

**Figure S5.** TEM (a), HRTEM images (b), DF-STEM image (c) and the corresponding C (d) O (e) and Fe (f) elemental maps of FeO<sub>x</sub>-CNS-60.

**Table S1.** A summary of the fitted parameters of the arsenic adsorption isotherms and kinetics.

| Samples                  | Freundlich model |          |                                                                   | Pseudo-second-order kinetic model |                                                                  |                                                                  |                                                 |
|--------------------------|------------------|----------|-------------------------------------------------------------------|-----------------------------------|------------------------------------------------------------------|------------------------------------------------------------------|-------------------------------------------------|
|                          | R <sup>2</sup>   | <i>n</i> | <i>k</i><br>(mg <sup>(1-n)</sup> L <sup>n</sup> g <sup>-1</sup> ) | R <sup>2</sup>                    | <i>k</i> <sub>2</sub><br>(g mg <sup>-1</sup> min <sup>-1</sup> ) | <i>V</i> <sub>0</sub><br>(mg g <sup>-1</sup> min <sup>-1</sup> ) | <i>q</i> <sub>eq</sub><br>(mg g <sup>-1</sup> ) |
| A-CNS                    | 0.988            | 1.36     | 0.676                                                             |                                   |                                                                  |                                                                  |                                                 |
| S-CNS                    | 0.987            | 1.48     | 1.073                                                             |                                   |                                                                  |                                                                  |                                                 |
| FeO <sub>x</sub> -CNS-7  | 0.996            | 1.23     | 0.694                                                             |                                   |                                                                  |                                                                  |                                                 |
| FeO <sub>x</sub> -CNS-13 | 0.992            | 1.06     | 0.414                                                             | 1.000                             | 0.0003                                                           | 12.1                                                             | 196                                             |
| FeO <sub>x</sub> -CNS-28 | 0.996            | 1.48     | 1.307                                                             |                                   |                                                                  |                                                                  |                                                 |
| FeO <sub>x</sub> -CNS-60 | 0.998            | 1.63     | 1.780                                                             |                                   |                                                                  |                                                                  |                                                 |

  

| Samples                  | Freundlich model |          |                                                                   | Pseudo-second-order kinetic model |                                                                  |                                                                  |                                                 |
|--------------------------|------------------|----------|-------------------------------------------------------------------|-----------------------------------|------------------------------------------------------------------|------------------------------------------------------------------|-------------------------------------------------|
|                          | R <sup>2</sup>   | <i>n</i> | <i>k</i><br>(mg <sup>(1-n)</sup> L <sup>n</sup> g <sup>-1</sup> ) | R <sup>2</sup>                    | <i>k</i> <sub>2</sub><br>(g mg <sup>-1</sup> min <sup>-1</sup> ) | <i>V</i> <sub>0</sub><br>(mg g <sup>-1</sup> min <sup>-1</sup> ) | <i>q</i> <sub>eq</sub><br>(mg g <sup>-1</sup> ) |
| A-CNS                    | 1.000            | 1.10     | 0.098                                                             |                                   |                                                                  |                                                                  |                                                 |
| S-CNS                    | 0.999            | 0.96     | 0.048                                                             |                                   |                                                                  |                                                                  |                                                 |
| FeO <sub>x</sub> -CNS-7  | 0.994            | 1.10     | 0.203                                                             |                                   |                                                                  |                                                                  |                                                 |
| FeO <sub>x</sub> -CNS-13 | 0.995            | 0.90     | 0.140                                                             | 1.000                             | 0.0005                                                           | 15.0                                                             | 172                                             |
| FeO <sub>x</sub> -CNS-28 | 0.992            | 1.15     | 0.155                                                             |                                   |                                                                  |                                                                  |                                                 |
| FeO <sub>x</sub> -CNS-60 | 0.989            | 1.28     | 0.219                                                             |                                   |                                                                  |                                                                  |                                                 |

**Table S2.** Summary of arsenic adsorption capacity data.

| Samples                       | $q_{max}$ (mg g <sup>-1</sup> ) for As(III) | $q_{max}$ (mg g <sup>-1</sup> ) for As(V) |
|-------------------------------|---------------------------------------------|-------------------------------------------|
| A-CNS                         | 104                                         | 50                                        |
| S-CNS                         | 138                                         | 63                                        |
| FeO <sub>x</sub> -CNS-7       | 246                                         | 93                                        |
| <b>FeO<sub>x</sub>-CNS-13</b> | <b>416</b>                                  | <b>201</b>                                |
| FeO <sub>x</sub> -CNS-28      | 182                                         | 61                                        |
| FeO <sub>x</sub> -CNS-60      | 160                                         | 50                                        |



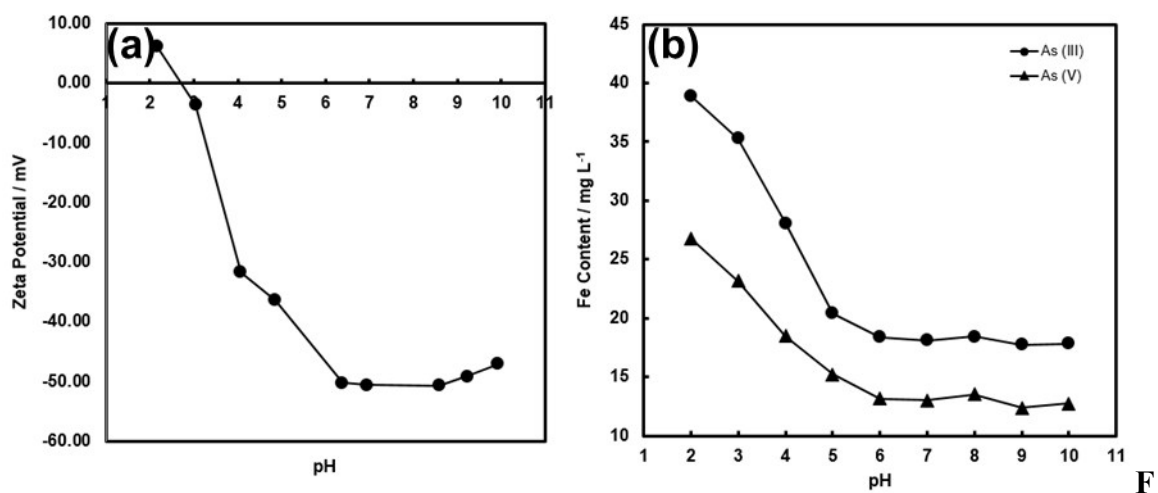

**figure S6.** (a) Zeta potential of FeO<sub>x</sub>-CNS-13 as a function of pH, and (b) the concentration of leached Fe in the equilibrium solution as a function of pH, where the initial arsenic concentration is 1,000 mg L<sup>-1</sup>.
